# Supplementary material
Source: publisher figshare collection journal article supplement (https://becaris.figshare.com/articles/dataset/_/25605363)
Supplement: Supplementary file 1 [file 1]

## Sheet: Sheet1
Name	Concept ID list
Diuretics loop	21054694,35780101,35850101,36267216,40867241,40870731,40893666,41041831,41226110,42958821,40984892,41183080,43024262,43178593,43604992,40901782,41163730,41322928,43605000,43802377,21064561,21156610,40071798,40854858,40939356,40983616,41080877,41120449,41241933,41272781,43730916,40979410,41054239,41104597,43748817,44073455,21069437,21074485,40908054,40908055,40995447,41102255,41170210,43658764,408…
Calcium channel blockers	994855,2063102,2066100,2925559,2925625,2925697,2926322,19029631,19044935,19133605,21053028,21054774,21056466,21072727,21072732,35144942,35778833,35887636,35887692,36257903,36279532,36506504,37592807,40171415,40723094,40740032,40740156,40828343,40835586,41014746,41051760,41057121,41057192,41293573,42683468,21030574,35409573,36880191,40823567,40841182,40859608,40892493,40963649,40998737,43167692,41…
Beta-blockers	974431,2061921,2061974,2926774,2937950,21030212,21030586,36263921,40881157,21095622,35749408,35772486,36064996,36232354,36259757,36271963,40243553,40843321,40849919,41070626,41087450,41161114,41197348,41198372,41286559,21162405,40926326,40934581,40962398,40974381,41060990,41106641,41162245,41311276,41321630,42949656,42949660,43032159,43255045,43747154,43857371,40828460,40849885,40950083,41009543,…
Angiotensin converting enzyme inhibitors (ACEi)	994855,2063102,2066100,2925559,2925625,2925697,2926322,21053028,21072727,21072732,21111942,21151163,21158396,21170860,40171415,40723094,40743160,40948897,40988917,40999870,41091277,41200131,41219979,41324439,42655617,35159665,35752288,36259757,36880191,37592807,40892493,41077690,41096421,41204763,41261981,41265591,41308831,42683468,42930493,42955521,43138535,40976765,41111082,43033307,40940270,41…
Angiotensin II receptor blockers (ARBs)	2022461,2026951,2035549,2035688,2059537,2061868,2064537,2066240,2924014,2926316,2936443,21062972,21091800,35751928,35752217,35760339,35768647,35868712,35887191,36035623,36074963,36261209,36263537,36273879,37593429,40938826,41032265,41067129,41074770,41106228,41137606,42955704,42955718,42969142,43036202,43149102,43177881,43189787,35868813,40839225,41057293,41173236,43033412,43133787,43167788,42932…
Sodium-glucose lowering transporter 2 inhibitor (SGLT2i)	21032132,35763316,36503641,36507512,36035513,40929856,36782044,36788049,36782055,21037075,42962857,46287410,1831715,37499622,44785833,40721264,36066352,36248789,36812966,44090000,21130196,35759112,36788787,43283552,1396416,21037078,43272760,783438,36785106,36788041,36788046,40898738,42963148,46287685,21130197,35769766,36246430,36247438,44095942,784070,2920881,40749309,44074012,1146743,36246401,36…
finerenone	1537459,1537466,1537464,1537455,1537453,1537460,1537458,1537456,1537451,1537452,1537465,1537463,1537461,1537454,1537462
